# Supplementary material
Source: PubMed Central journal article supplement (PMC3859842)
Supplement: NIHMS498247-supplement-Table_of_Contents.pdf [file NIHMS498247-supplement-Table_of_Contents.pdf]

## Table of Contents

| Section                                                                                                                       | Pages |
|-------------------------------------------------------------------------------------------------------------------------------|-------|
| Abstract                                                                                                                      | 2     |
| Introduction: Drug tolerance is an important barrier to shortening TB treatment                                               | 3-4   |
| Actively-growing intracellular mycobacteria exhibit multidrug tolerance mediated by macrophage-induced bacterial efflux pumps | 5-7   |
| Macrophage-induced <i>Mycobacterium tuberculosis</i> efflux pumps are virulence determinants                                  | 7-9   |
| <i>Mycobacterium tuberculosis</i> macrophage-induced efflux pumps: signals and substrates                                     | 9-12  |
| Function and regulation of macrophage-induced efflux: a teleological perspective                                              | 12-13 |
| Therapeutic implications for drug tolerance                                                                                   | 13-15 |
| Efflux pump inhibition for drug-resistant TB                                                                                  | 15-17 |
| Conclusions                                                                                                                   | 17    |
| Acknowledgements                                                                                                              | 17-18 |
| Table 1:<br>Macrophage-induced <i>Mycobacterium tuberculosis</i> efflux pumps                                                 | 19-21 |
| Table 2:<br>Bacterial efflux pumps associated with virulence                                                                  | 22-25 |
| Table 3:<br>Mycobacterial Species with Homologs of <i>Mycobacterium tuberculosis</i> Macrophage-Induced Pumps                 | 26-27 |
| Figure 1:<br>Model for Efflux Pump Inhibitor Action in <i>Mycobacterium tuberculosis</i>                                      | 28    |
| References                                                                                                                    | 29-44 |
